# Supplementary material for: A Highly Sensitive Nonenzymatic Glucose Biosensor Based on the Regulatory Effect of Glucose on Electrochemical Behaviors of Colloidal Silver Nanoparticles on MoS2 †
Source: PubMed Central journal article supplement (PMC5579834; doi:10.3390/s17081807), 2017-08-05
Supplement: sensors-17-01807-s001.pdf [file sensors-17-01807-s001.pdf]

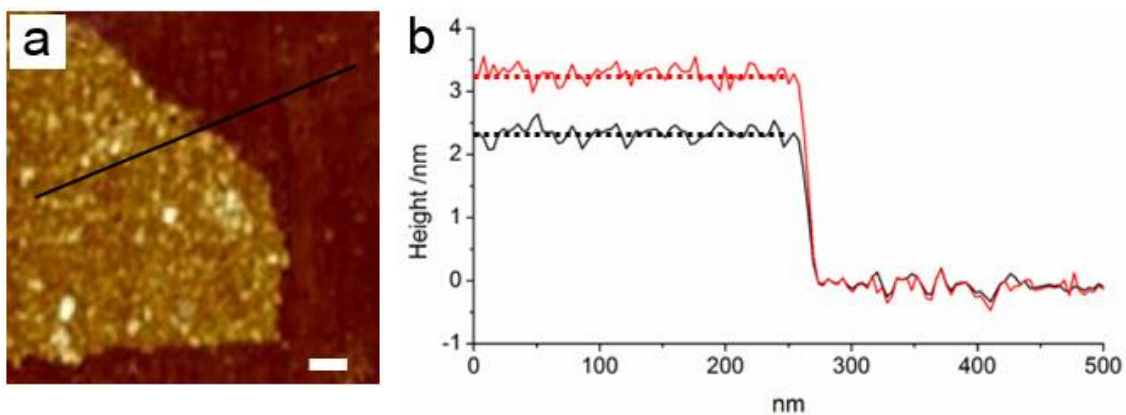

**Figure S1.** Atomic Force Microscopy (AFM) Characterization. (a) In-solution AFM image of AgNPs/MoS<sub>2</sub>. Z scale: 4.5 nm. Scale bar: 50 nm; (b) Height information of cross section in a shows that the height of MoS<sub>2</sub> increased by ~1 nm when 1 mM glucose was added in the solution (black line: no glucose, red line: 1 mM glucose).

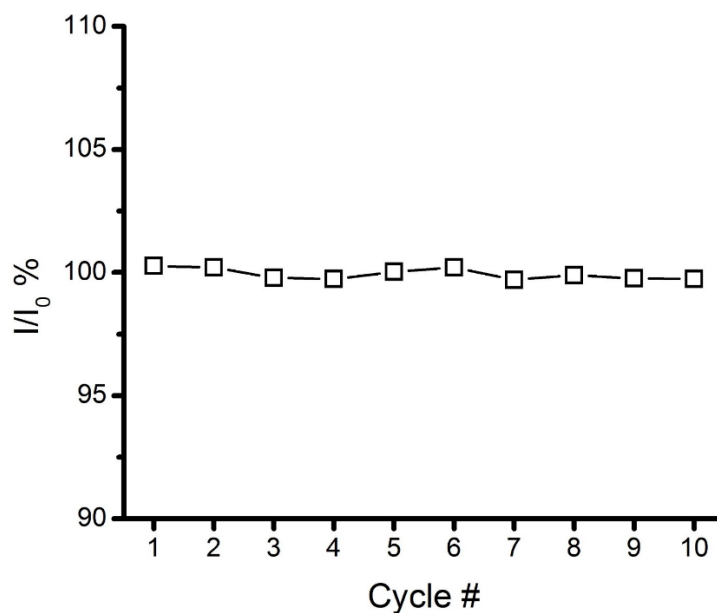

**Figure S2.** Reversibility of the Regulatory Effect. The ratio of the peak current of the AgNPs/MoS<sub>2</sub> electrode after repeatedly performing glucose detection in the solution containing glucose and then being brought back to 0.1 M NaOH, to the initial peak current.
